## Correction

# Correction: Comparative Molecular Dynamics Simulation of Hepatitis C Virus NS3/4A Protease (Genotypes 1b, 3a and 4a) Predicts Conformational Instability of the Catalytic Triad in Drug Resistant Strains

The *PLOS ONE* Staff

## Notice of Republication

This article was republished on November 20, 2014, due to an error in the title and citation, as well as the spelling of the name of the fifth author, Muhammad Ikram Anwar. The originally published, uncorrected article and the republished, corrected article are provided here for reference.

## Supporting Information

**File S1.** Originally published, uncorrected article (PDF)

**File S2.** Republished, corrected article (PDF)

## Reference

1. Kramer M, Halleran D, Rahman M, Iqbal M, Anwar MI, et al. (2014) Comparative Molecular Dynamics Simulation of Hepatitis C Virus NS3/4A Protease (Genotypes 1b, 3a and 4a) Predicts Conformational Instability of the Catalytic Triad in Drug Resistant Strains. *PLoS ONE* 9(8): e104425. doi:10.1371/journal.pone.0104425

**Citation:** The *PLOS ONE* Staff (2014) Correction: Comparative Molecular Dynamics Simulation of Hepatitis C Virus NS3/4A Protease (Genotypes 1b, 3a and 4a) Predicts Conformational Instability of the Catalytic Triad in Drug Resistant Strains. *PLoS ONE* 9(12): e116131. doi:10.1371/journal.pone.0116131

**Published:** December 19, 2014

**Copyright:** © 2014 The *PLOS ONE* Staff. This is an open-access article distributed under the terms of the Creative Commons Attribution License, which permits unrestricted use, distribution, and reproduction in any medium, provided the original author and source are credited.
